# Supplementary material
Source: Springer Nature journal article supplement (https://www.springermedizin.de/resource/supplementary/13256_2011_2116_MOESM1_ESM.pdf/9649144)

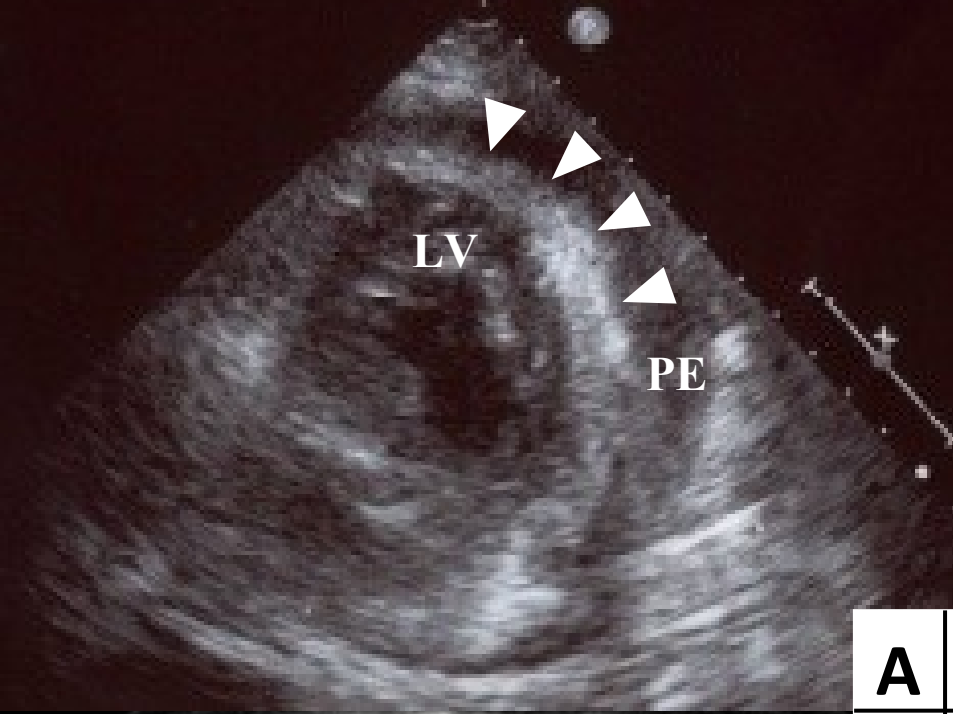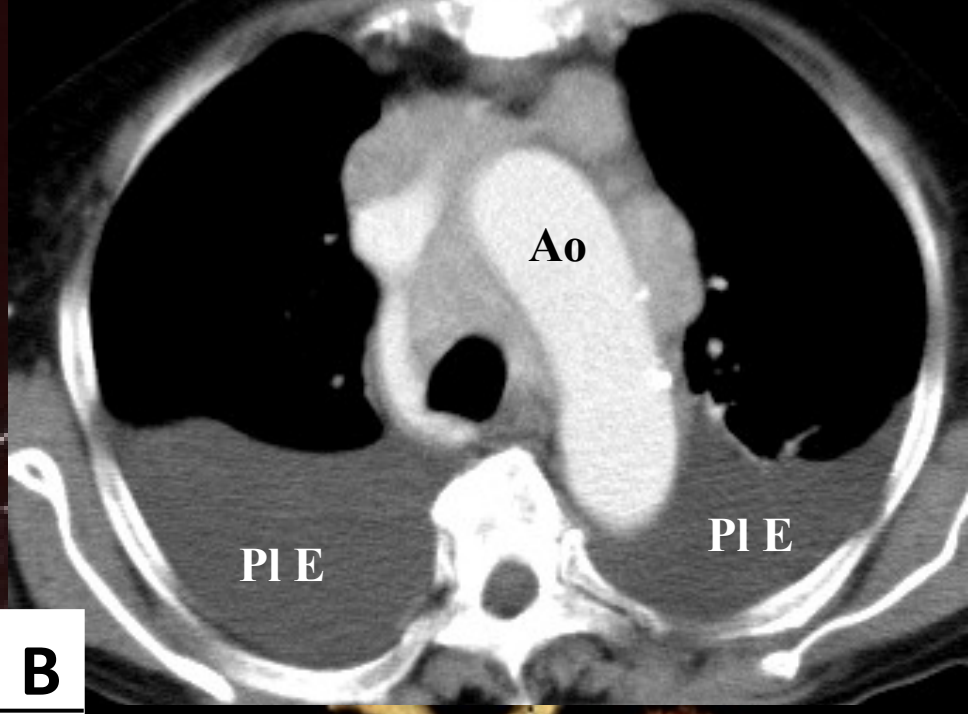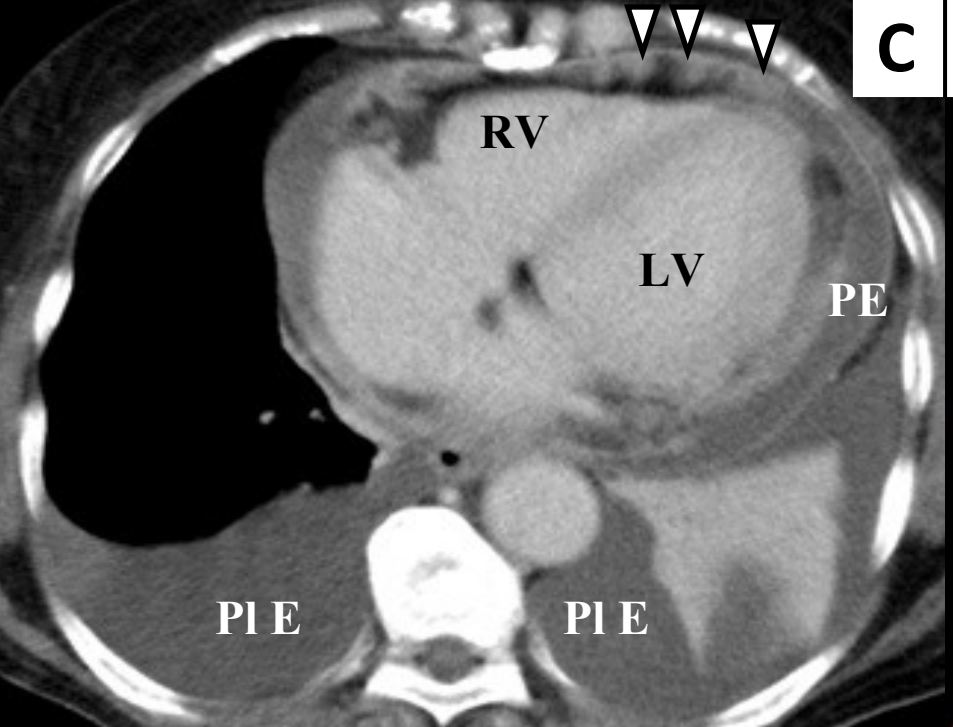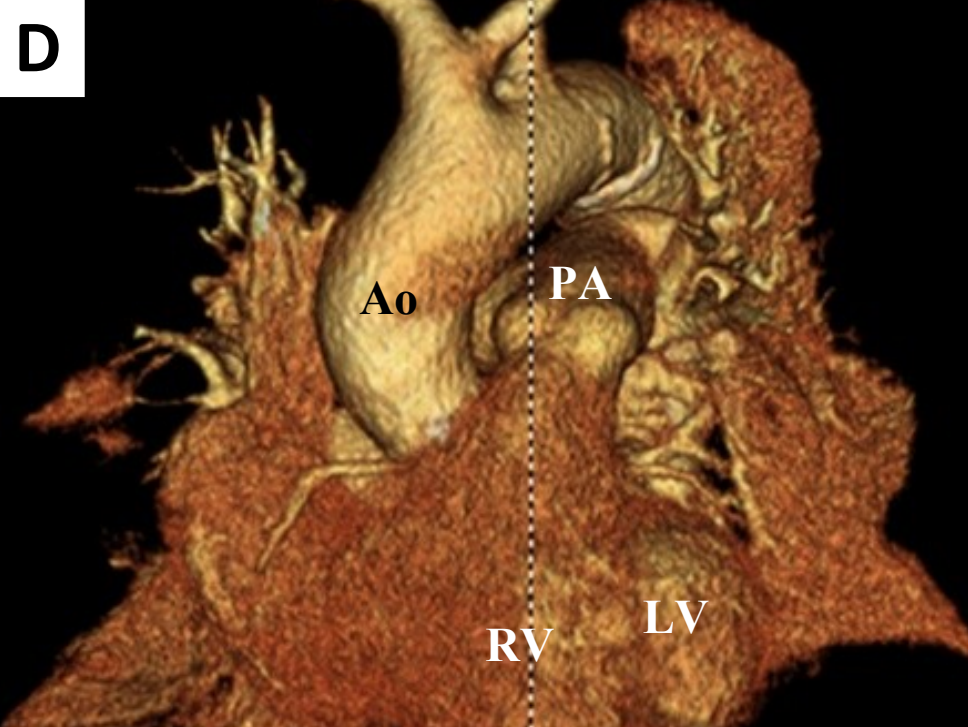

|          |          |
|----------|----------|
| <b>A</b> | <b>B</b> |
| <b>C</b> | <b>D</b> |

Supplement: MOESM1 [file 9649144]
